# Supplementary material for: Plant Functional Diversity Is Linked to Carbon Storage in Deciduous Dipterocarp Forest Edges in Northern Thailand
Source: MDPI journal article supplement (doi:10.3390/su132011416), 2021-10-15
Supplement: s1 [file s1]

# Supplementary 1

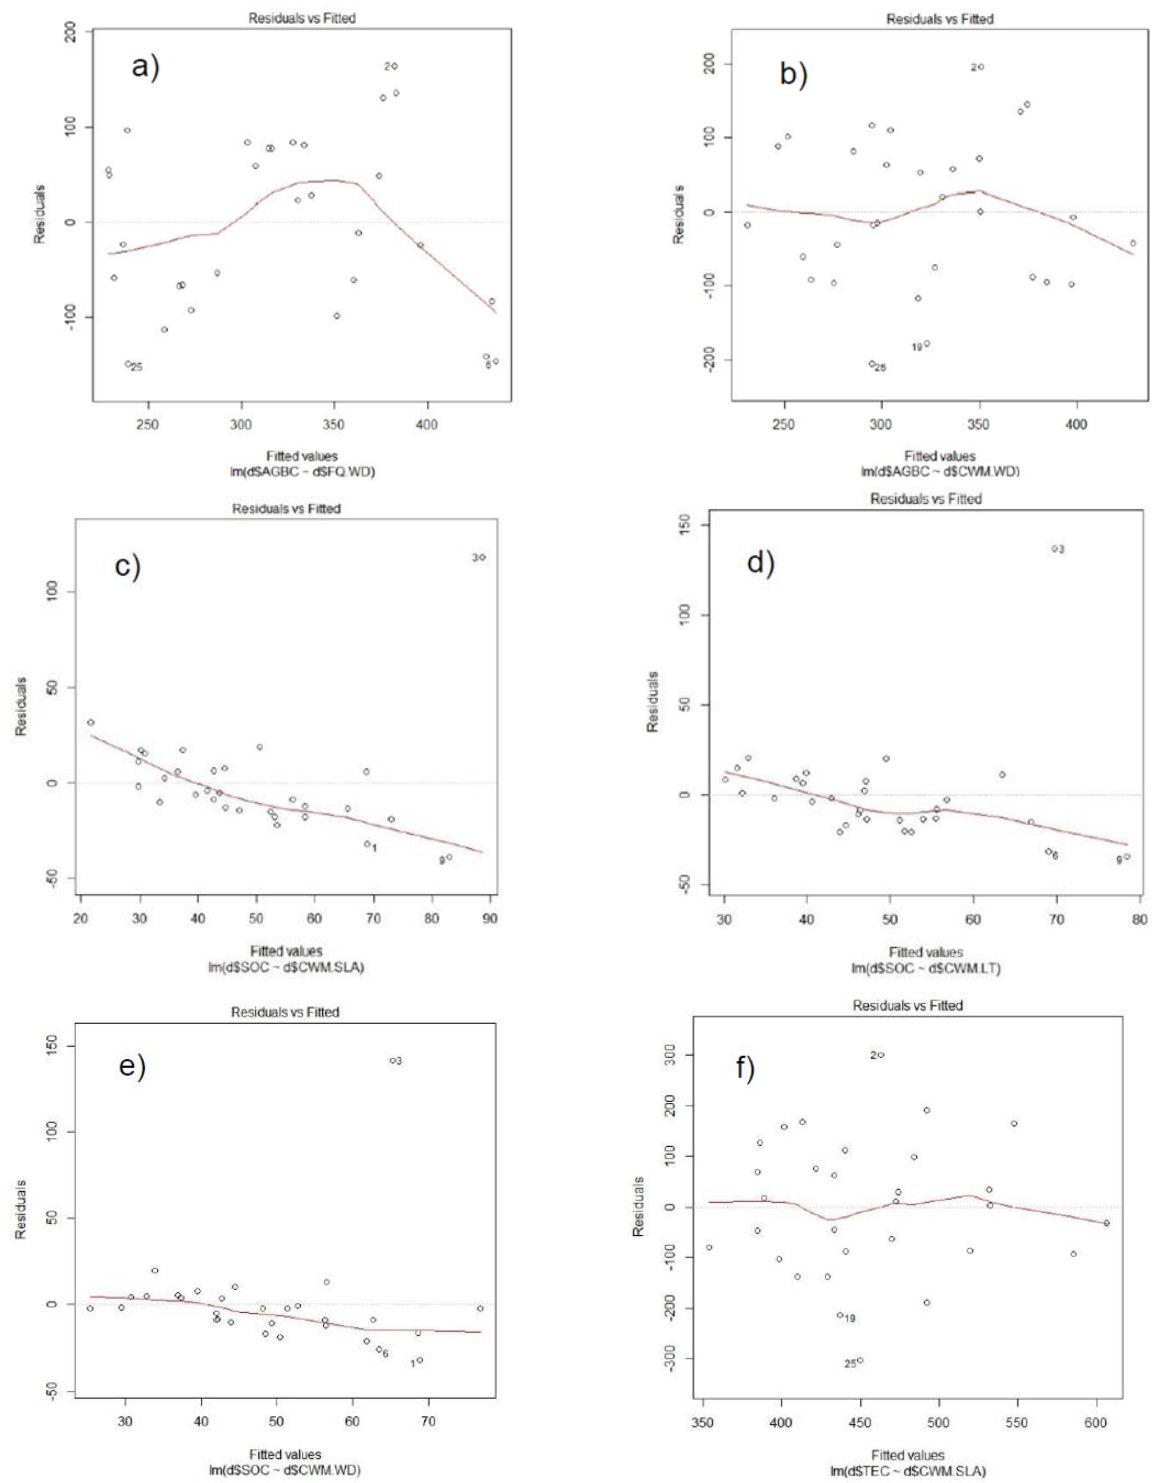

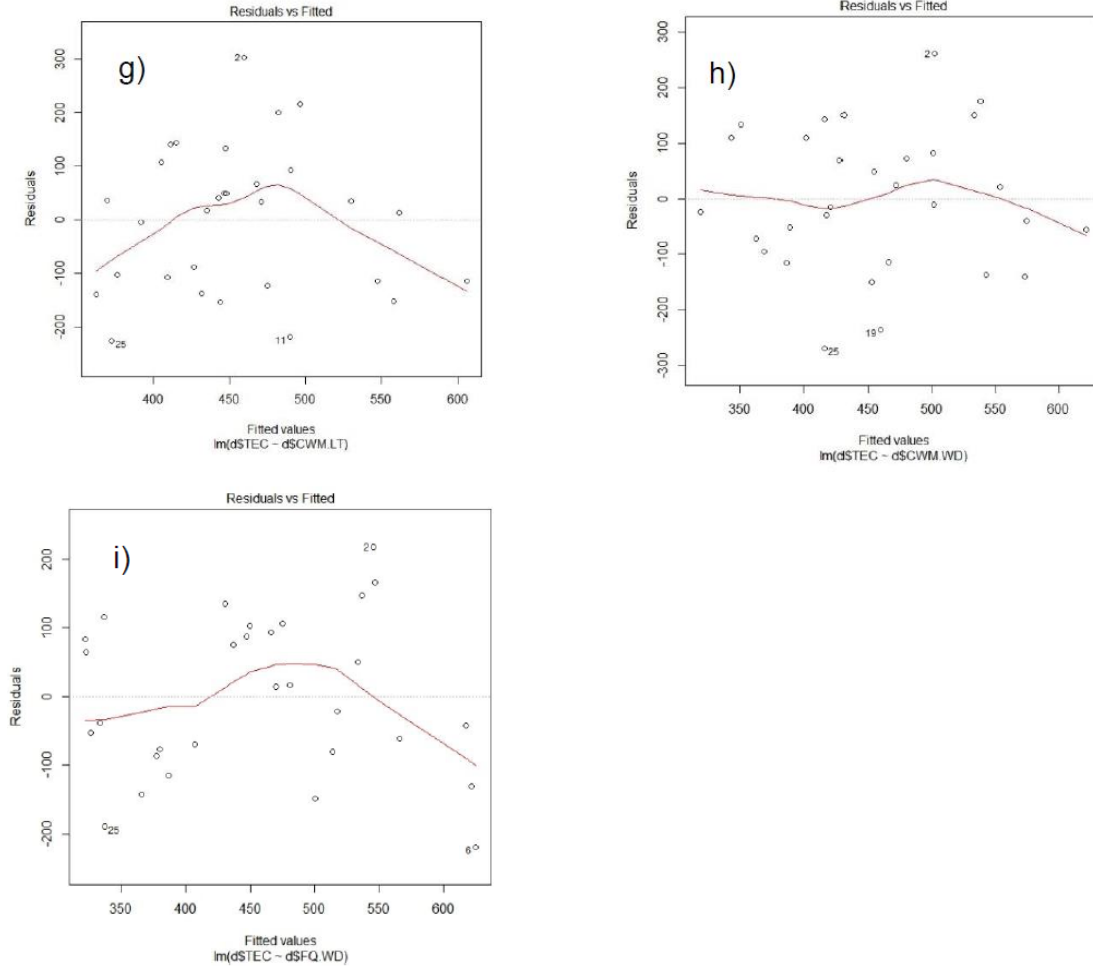

**Figure S1.** The residuals over predicted values of pairwise relationships between components of carbon storage; aboveground biomass carbon (AGBC), soil organic carbon (SOC), and total ecosystem carbon (TEC) and functional diversity; Rao's quadratic diversity index (FQ) and community weighted mean (CWM) of specific leaf area (SLA), leaf thickness (LT), and wood density (WD) in the deciduous dipterocarp forest edge ecosystem.
