# Supplementary material for: Plant Functional Diversity Is Linked to Carbon Storage in Deciduous Dipterocarp Forest Edges in Northern Thailand
Source: MDPI journal article supplement (doi:10.3390/su132011416), 2021-10-15
Supplement: s1 [file s1]

Archive with 1 entries (1 files):
- sustainability-1375233-supplementary.pdf
